# Supplementary material for: Phylogeny, Evolution and Classification of Gall Wasps: The Plot Thickens
Source: PubMed Central journal article supplement (PMC4439057; doi:10.1371/journal.pone.0123301), 2015-05-20
Supplement: pone.0123301.s006.pdf [file pone.0123301.s006.pdf]

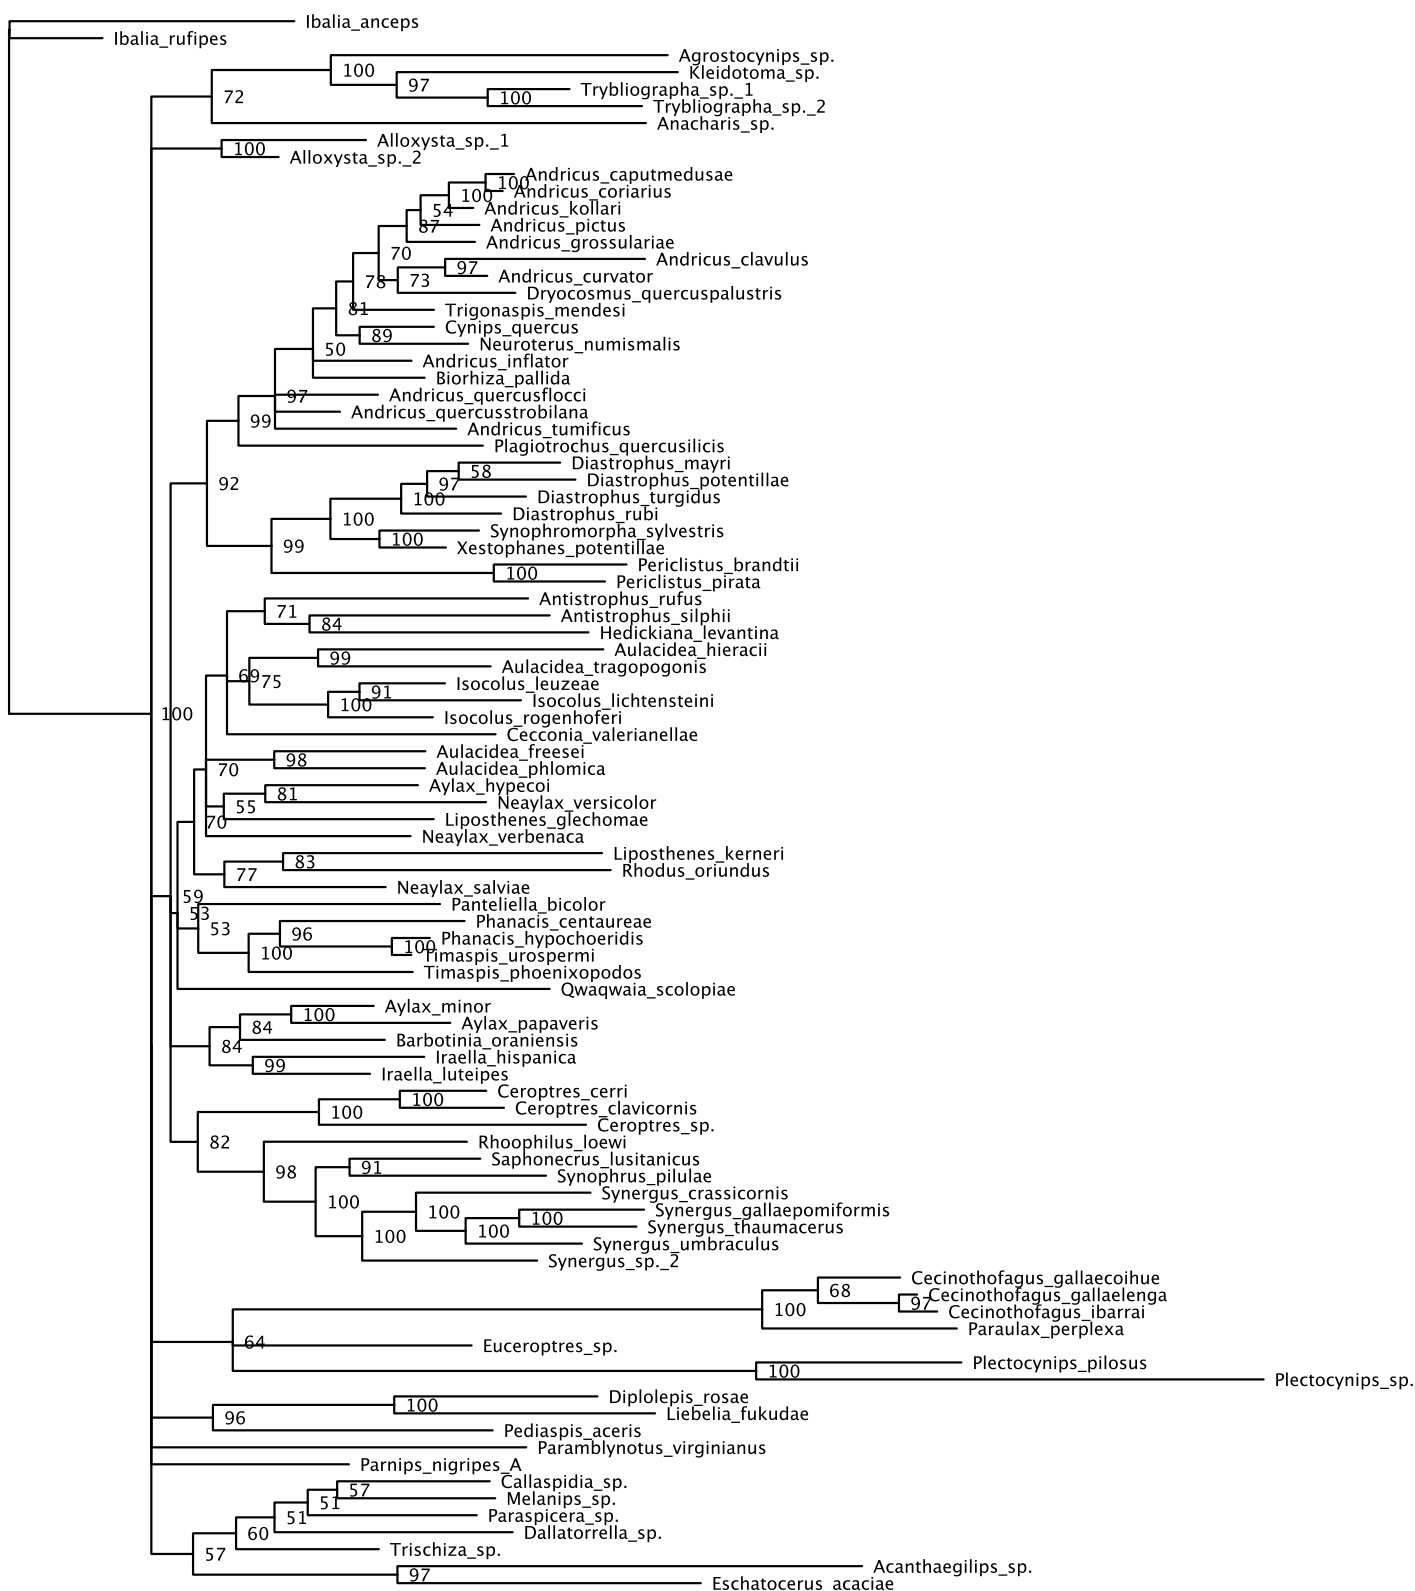

0.2

S1 Figure. Gene tree for COI with posterior clade probabilities (%) on branches.
