# Supplementary material for: Phylogeny, Evolution and Classification of Gall Wasps: The Plot Thickens
Source: PubMed Central journal article supplement (PMC4439057; doi:10.1371/journal.pone.0123301), 2015-05-20
Supplement: pone.0123301.s008.pdf [file pone.0123301.s008.pdf]

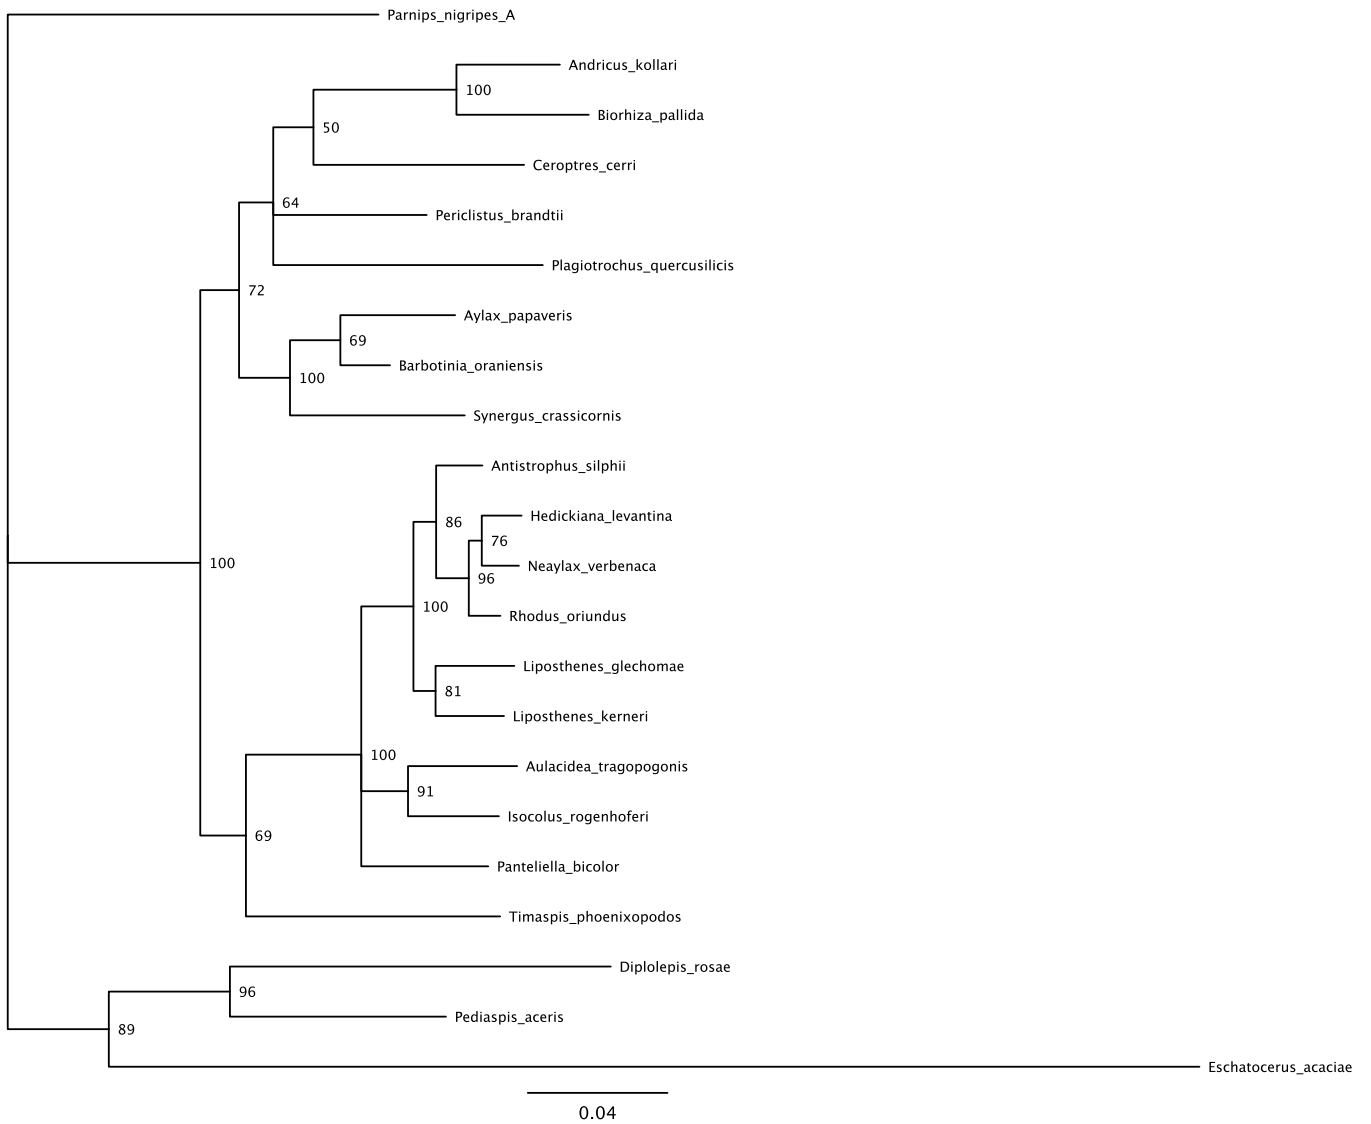

S3 Figure. Gene tree for LWRh with posterior clade probabilities (%) on branches.
