# Supplementary material for: Phylogeny, Evolution and Classification of Gall Wasps: The Plot Thickens
Source: PubMed Central journal article supplement (PMC4439057; doi:10.1371/journal.pone.0123301), 2015-05-20
Supplement: pone.0123301.s009.pdf [file pone.0123301.s009.pdf]

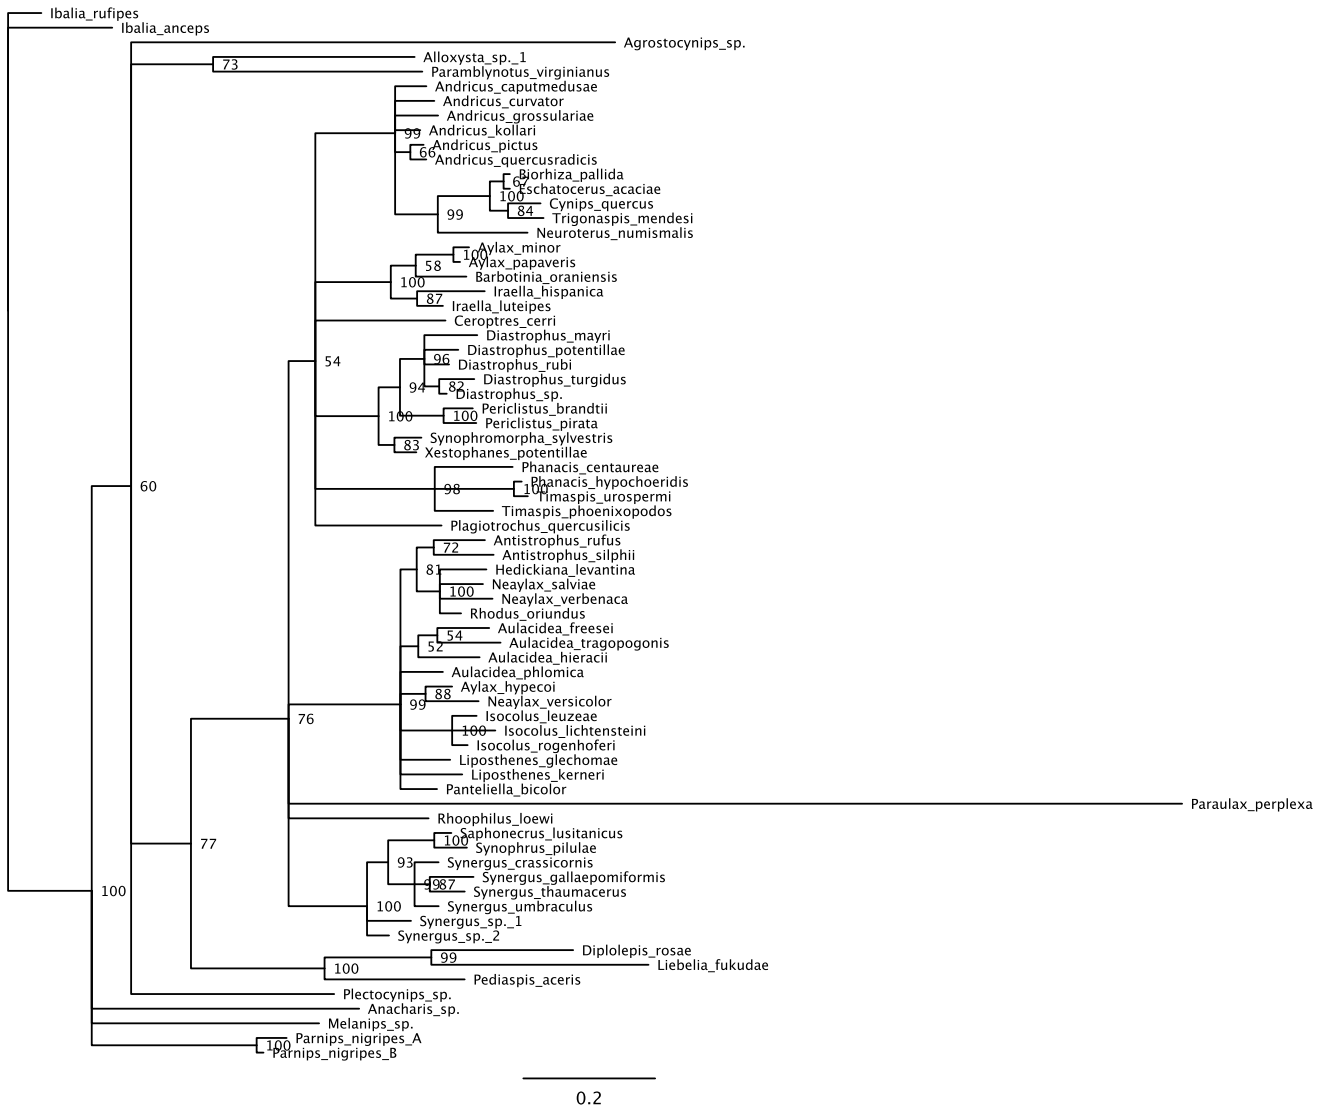

S4 Figure. Gene tree for EF1aF1 with posterior clade probabilities (%) on branches.
