# Supplementary material for: Phylogeny, Evolution and Classification of Gall Wasps: The Plot Thickens
Source: PubMed Central journal article supplement (PMC4439057; doi:10.1371/journal.pone.0123301), 2015-05-20
Supplement: pone.0123301.s010.pdf [file pone.0123301.s010.pdf]

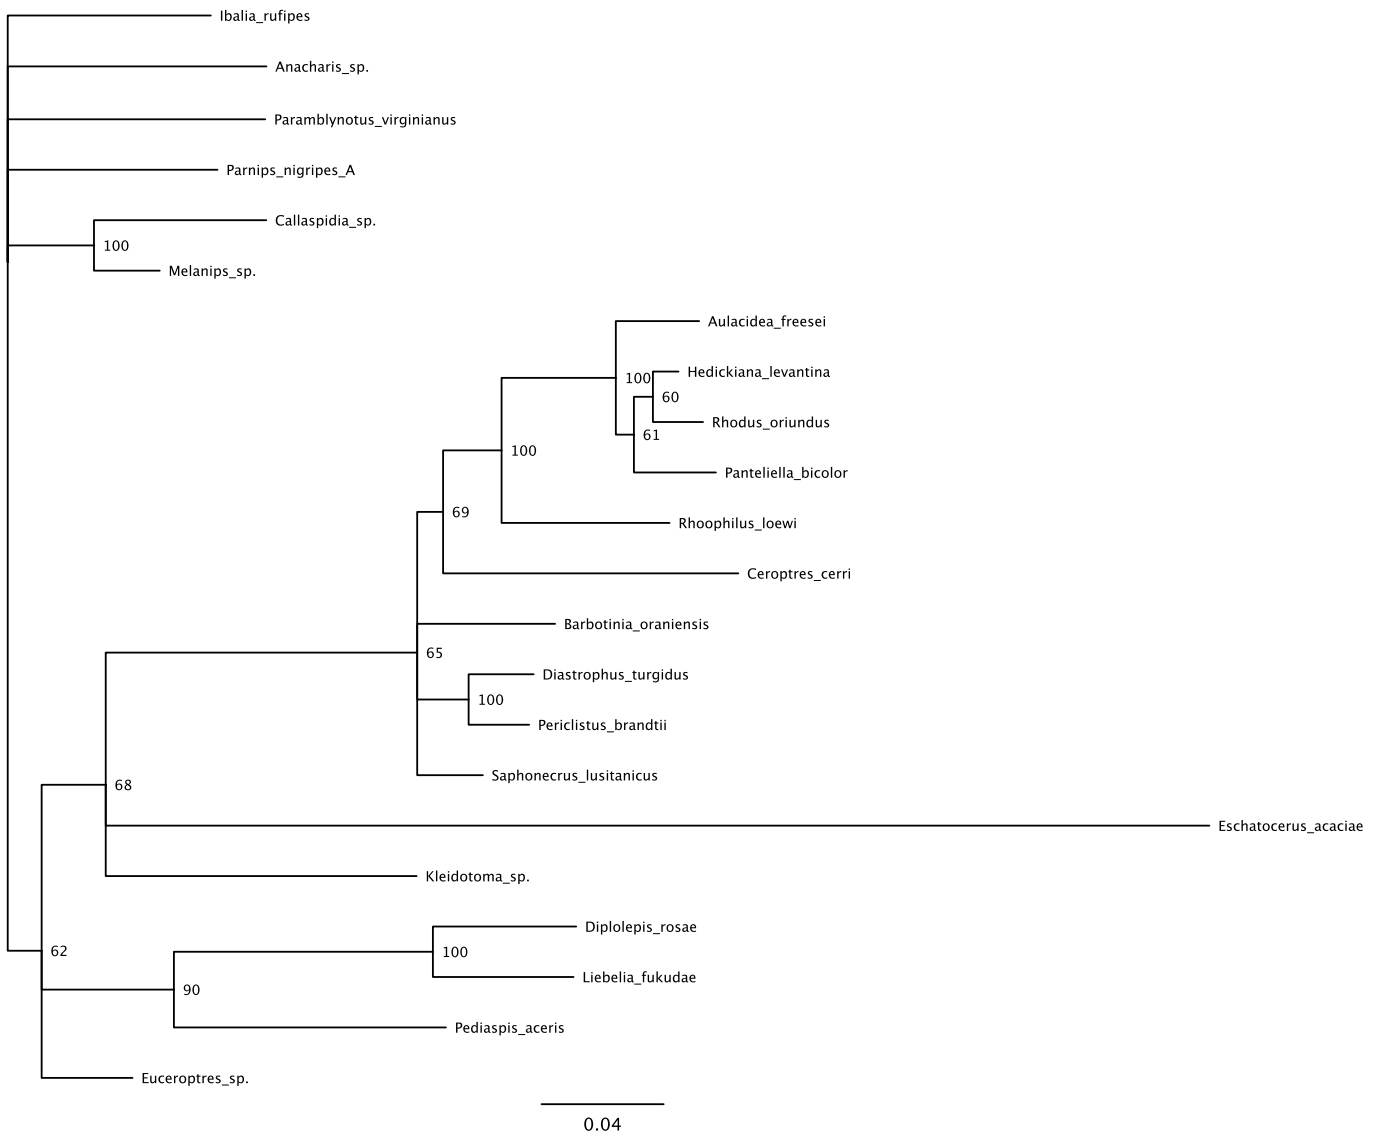

S5 Figure. Gene tree for EF1aF2 with posterior clade probabilities marked on branches.
