# Supplementary material for: Phylogeny, Evolution and Classification of Gall Wasps: The Plot Thickens
Source: PubMed Central journal article supplement (PMC4439057; doi:10.1371/journal.pone.0123301), 2015-05-20
Supplement: pone.0123301.s011.pdf [file pone.0123301.s011.pdf]

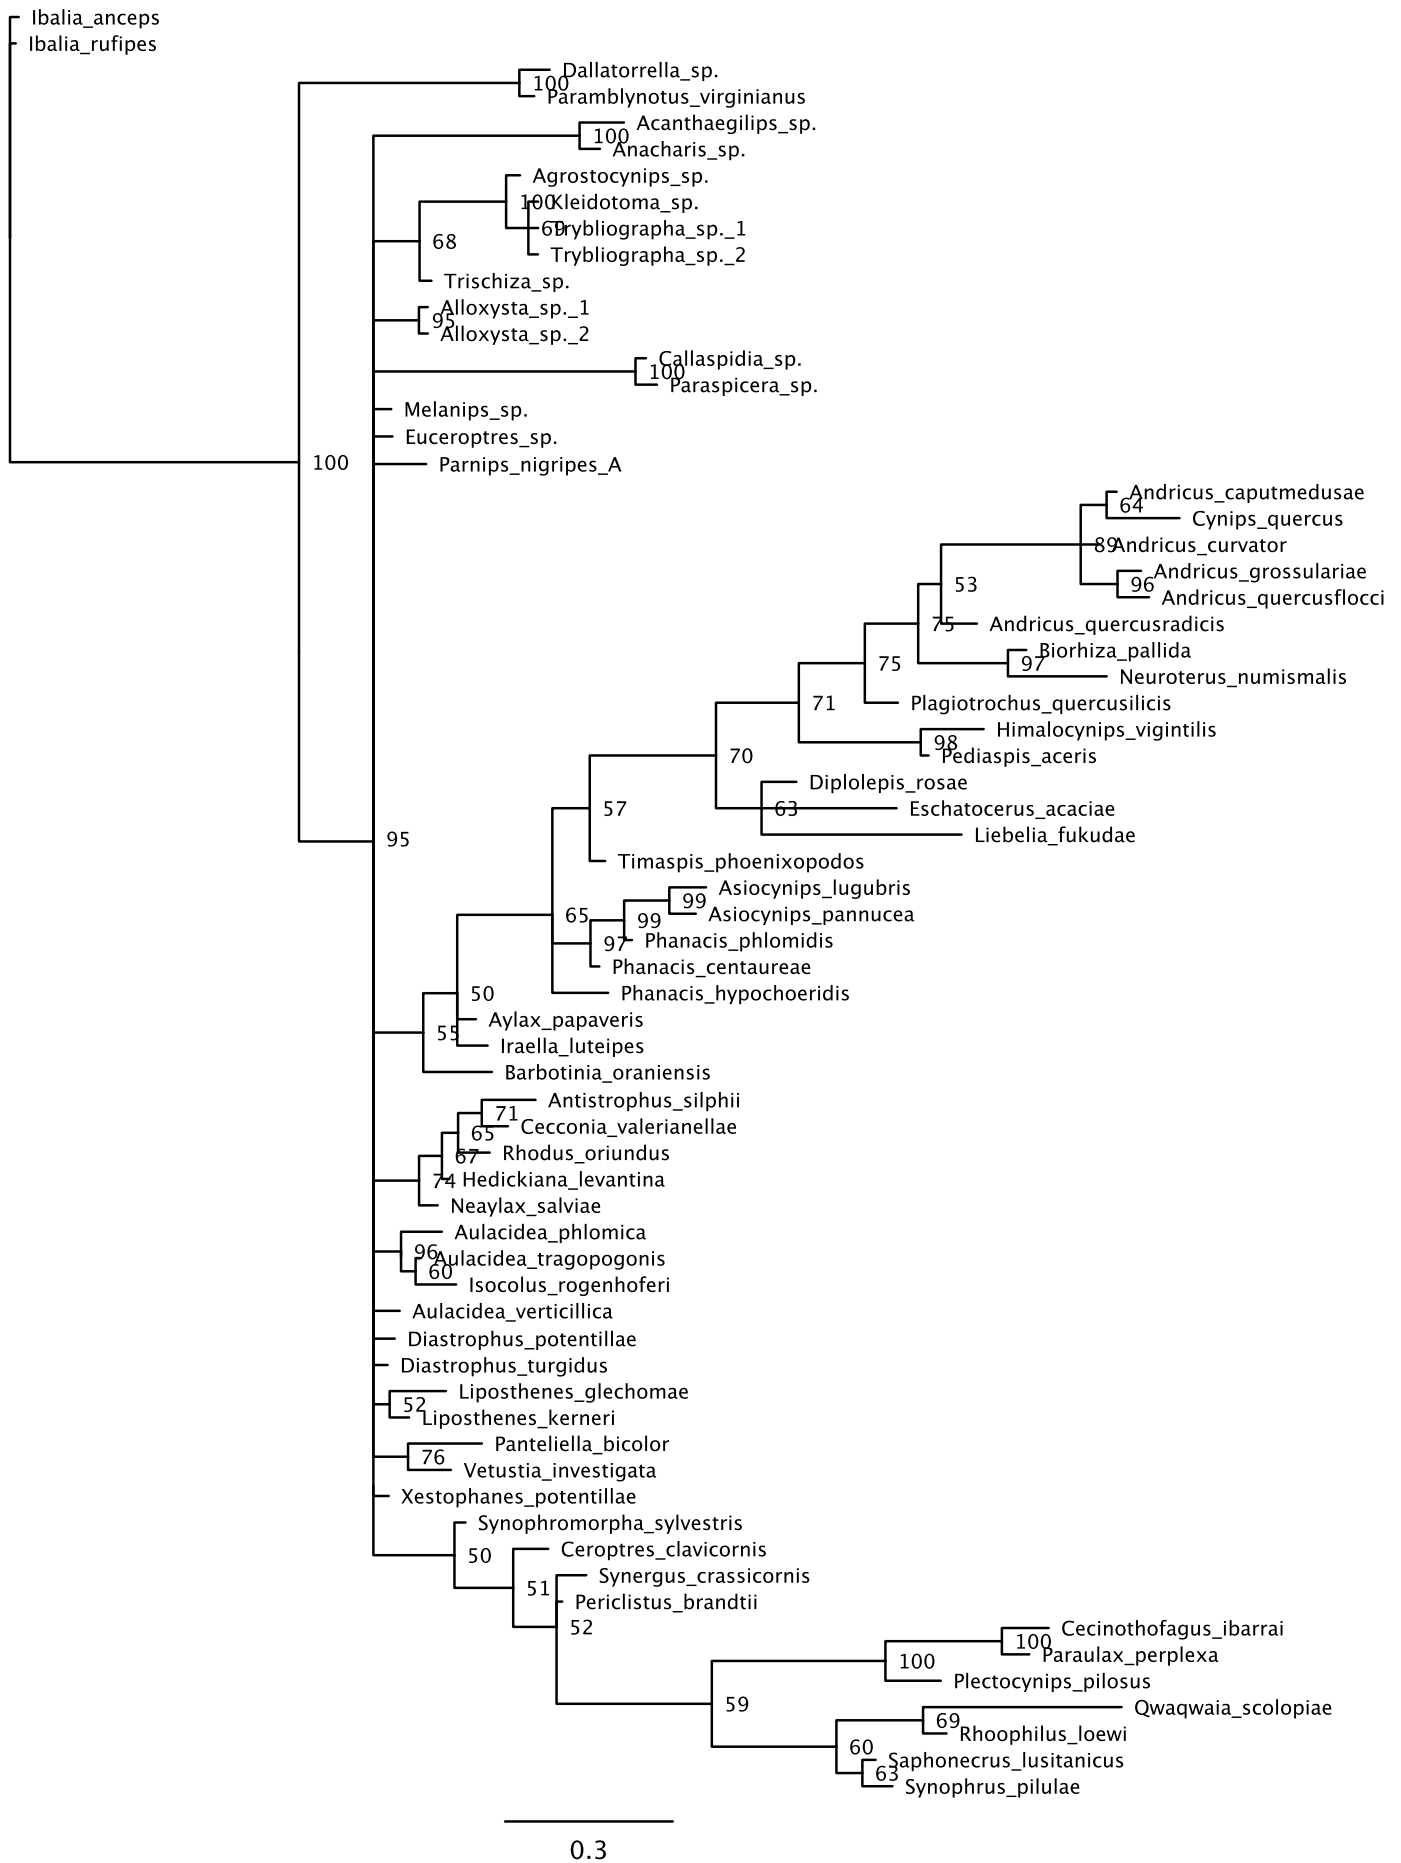

S6 Figure. Tree based on morphology, without biological data, with posterior clade probabilities (%) on branches.
