# Supplementary material for: Phylogeny, Evolution and Classification of Gall Wasps: The Plot Thickens
Source: PubMed Central journal article supplement (PMC4439057; doi:10.1371/journal.pone.0123301), 2015-05-20
Supplement: pone.0123301.s014.pdf [file pone.0123301.s014.pdf]

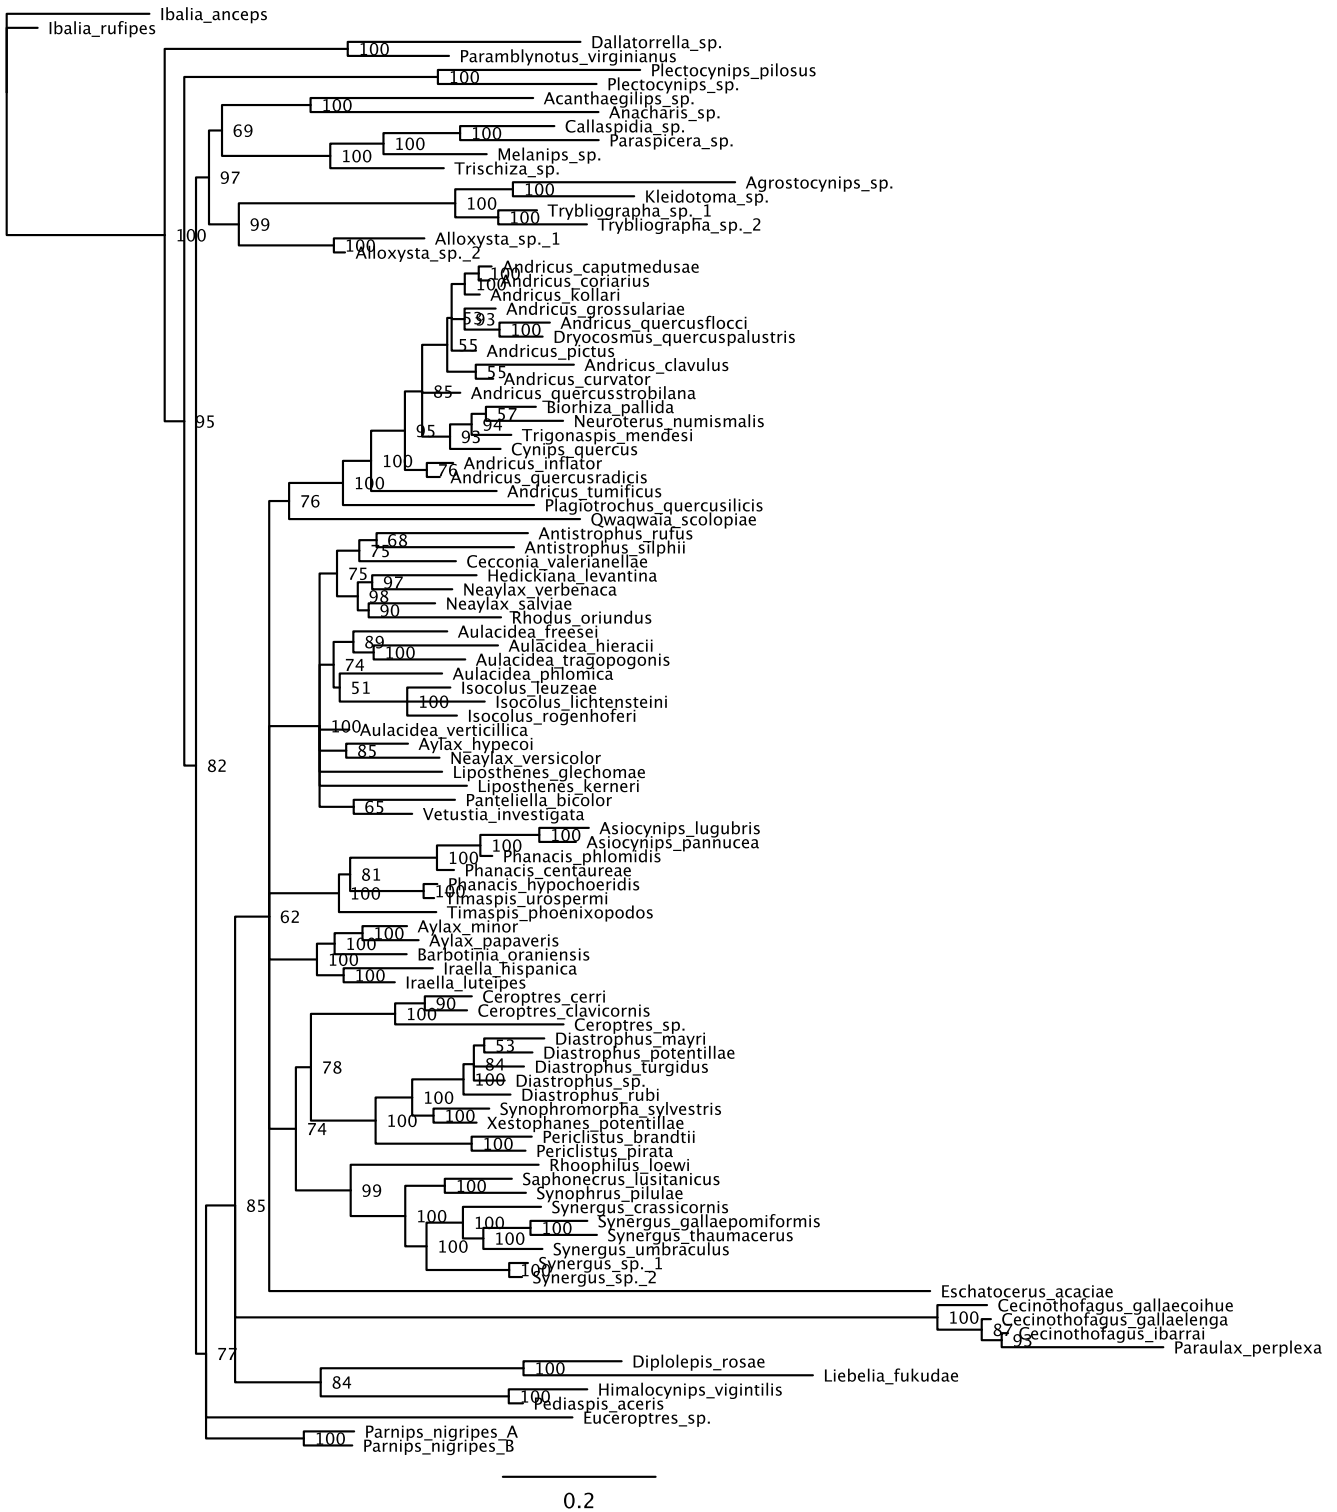

S9 Figure. Analysis of combined morphological, biological and molecular data, with incompletely coded gene regions removed. Posterior clade probabilities (%) on branches.
