# Supplementary material for: Phylogeny, Evolution and Classification of Gall Wasps: The Plot Thickens
Source: PubMed Central journal article supplement (PMC4439057; doi:10.1371/journal.pone.0123301), 2015-05-20
Supplement: pone.0123301.s015.pdf [file pone.0123301.s015.pdf]

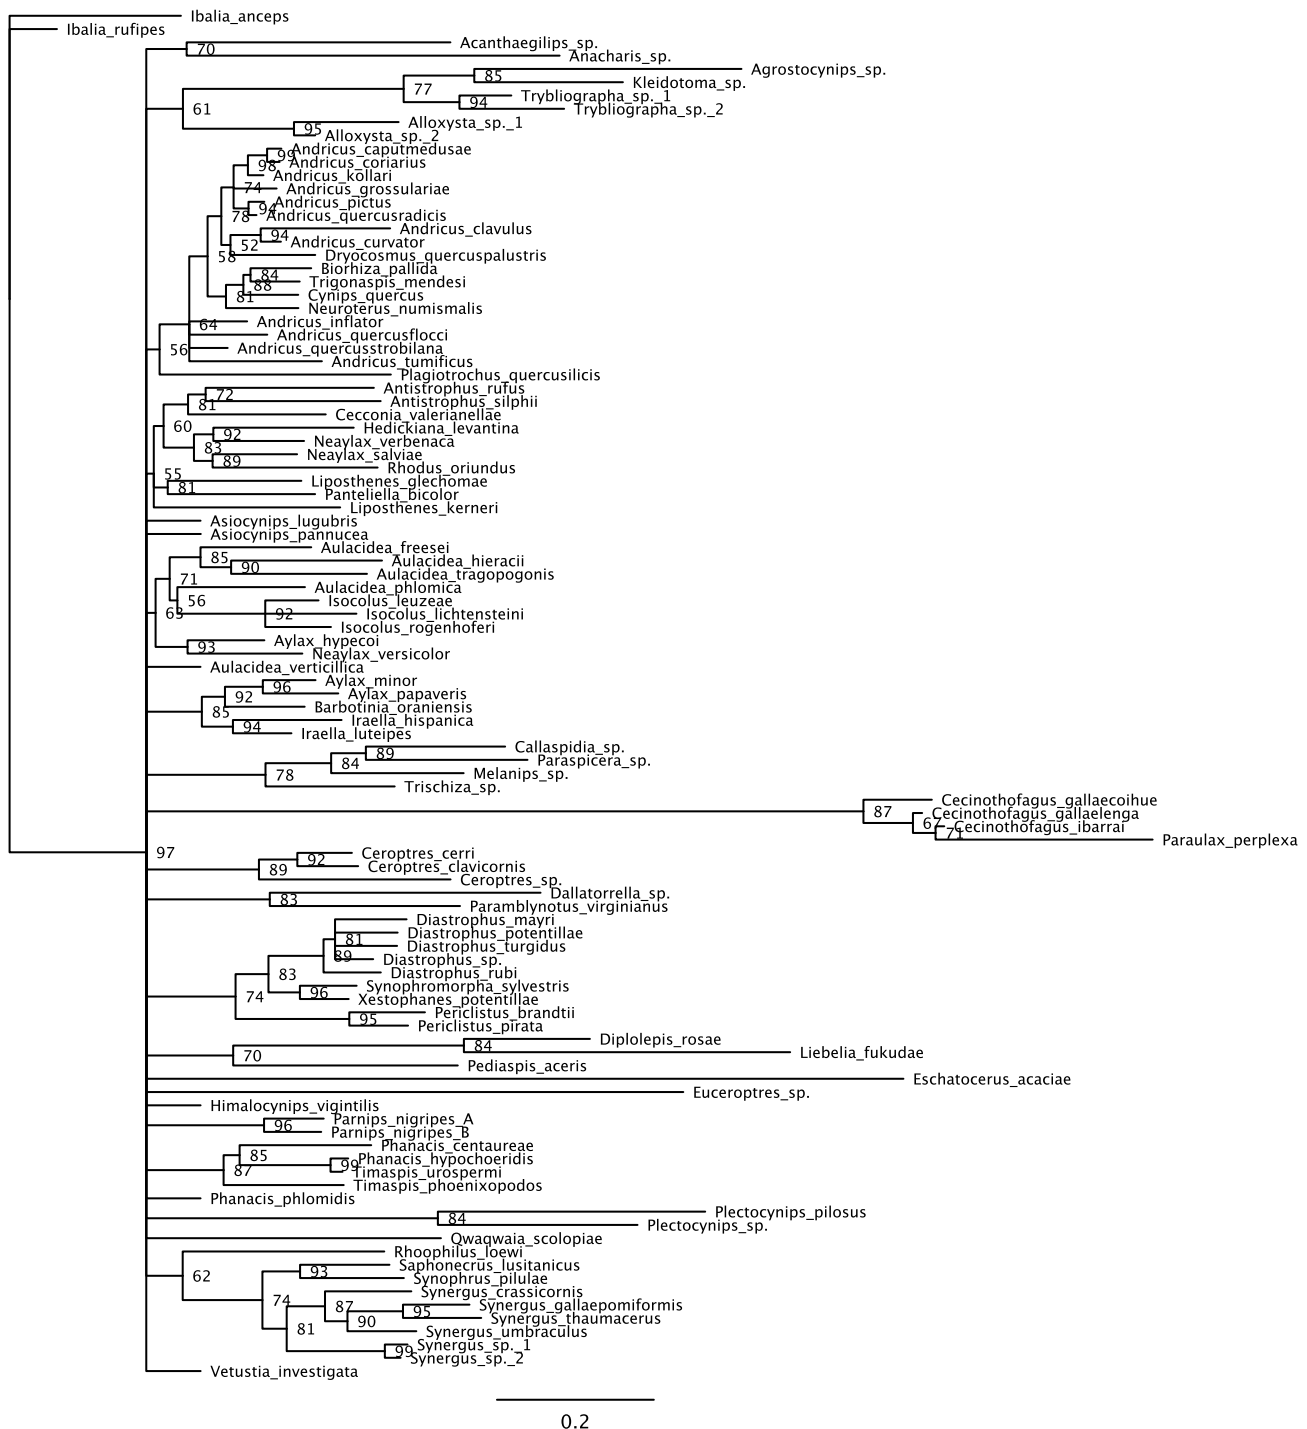

S10 Figure. Analysis of molecular data with incompletely coded gene regions removed. Posterior clade probabilities (%) on branches.
